# Supplementary material for: Development and evaluation of a gamified smart phone mobile health application for oral health promotion in early childhood: a randomized controlled trial
Source: PubMed Central journal article supplement (PMC7791794; doi:10.1186/s12903-020-01374-2), 2021-01-07
Supplement: 12903_2020_1374_MOESM1_ESM.pdf [file 12903_2020_1374_MOESM1_ESM.pdf]

**Questionnaire about mother's oral-health knowledge, mother's practice about children, demographic data and child's clinical examination:**

**Knowledge questions:**

1.1 . The first primary tooth erupts averagely at 6 months of age.

Yes  No  I do not know

1.2. Bacteria responsible for dental caries often transfer from mother to child.

Yes  No  I do not know

1.3. Fluoridated toothpastes should not be used for children under 3 years of age.

Yes  No  I do not know

1.4. White lines or spots are the first signs of caries in children.

Yes  No  I do not know

1.5. Tooth cleaning and toothbrushing should be started following the eruption of the first primary tooth.

Yes  No  I do not know

1.6. Fluoridated toothpastes prevent dental caries.

Yes  No  I do not know

1.7. Children should not use fluoride.

Yes  No  I do not know

1.8. Frequency of intake of sugary substances plays a more important role than the total amount of consumption of sugar in caries development.

Yes  No  I do not know

1.9. Irrigation of teeth with copious water after toothbrushing can effectively prevent caries.

Yes                       No                       I do not know

1.10. Consumption of xylitol in the form of chewing gum or snacks can decrease dental caries.

Yes                       No                       I do not know

1.11. The acidity of oral environment caused by the activity of bacteria after meals returns to normal after 5 min.

Yes                       No                       I do not know

1.12. Bottle-feeding can cause early childhood caries.

Yes                       No                       I do not know

1.13. Carious primary teeth need to be restored.

Yes                       No                       I do not know

The following items can cause dental caries.

| Item             | Yes | No | I do not know |
|------------------|-----|----|---------------|
| 1.14 Candy       |     |    |               |
| 1.15 Fruit juice |     |    |               |
| 1.16 Cola        |     |    |               |
| 1.17 Cheese      |     |    |               |
| 1.18 Tea         |     |    |               |

**Practice questions:**

2.1. Who brushes the teeth of your child?

- He/she does not brush yet
- Himself/Herself
- My other child
- Himself/Herself under the supervision of adults
- Adults

2.2. How often does your child brush his/her teeth?

- Irregularly or never
- Once a week
- Several times (2-3 times) a week
- Once a day
- More than once a day

2.3. Does your child rinse his/her mouth after eating sugary foods?

- Always
- Most of the time
- Occasionally
- Never

2.4. How often does your child have a sweet snack or sweet drink (warm or cold)?

- Three times or more per day
- Around 2 times per day
- Once a day
- Occasionally, not everyday
- Rarely

2.5. Do you use fluoridated toothpaste for your child?

- Always
- Most of the time
- Occasionally
- Never
- I do not know

**Demographic questions:**

Gender of the child?

Age of the child?

Age of mother?

Level of education of mother?

- Below high school diploma
- High school diploma
- College degree
- Bachelor's degree
- Master's degree
- Doctorate degree

Level of education of father?

- Below high school diploma
- High school diploma
- College degree
- Bachelor's degree
- Master's degree

Doctorate degree

Socioeconomic status of the family?

Poor

Moderate

Good

Excellent

How often does your child have a dental visit?

When there is a problem

Regularly every six months to once a year

Irregular

Etc. (explain...)

How often did you use the application?

Seldom

If needed

Regular

Phone number:

**Clinical examination:**

Plaque index (maximum score for mesiobuccal, midbuccal, distobuccal, and midlingual surfaces recorded for each tooth)

0: No dental plaque

1: Slight amount of dental plaque

2: High amount of dental plaque

3: Unerupted tooth

|    |    |    |    |    |  |    |    |    |    |    |
|----|----|----|----|----|--|----|----|----|----|----|
| 55 | 54 | 53 | 52 | 51 |  | 61 | 62 | 63 | 64 | 65 |
|    |    |    |    |    |  |    |    |    |    |    |
| 85 | 84 | 83 | 82 | 81 |  | 71 | 72 | 73 | 74 | 75 |
|    |    |    |    |    |  |    |    |    |    |    |
